# Supplementary material for: Human Health Risk Assessment by Dietary Intake and Spatial Distribution Pattern of Polybrominated Diphenyl Ethers and Dechloran Plus from Selected Cities of Pakistan
Source: MDPI journal article supplement (doi:10.3390/ijerph17249543), 2020-12-20
Supplement: s1 [file s1]

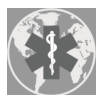

Supplementary Material

# Human Health Risk Assessment by Dietary Intake and Spatial Distribution Pattern of Polybrominated Diphenyl Ethers and Dechloran Plus from selected cities of Pakistan

Adeel Mahmood <sup>1,5</sup>, Jabir Hussain Syed <sup>2</sup>, Waseem Raza <sup>3</sup>, Amtul Bari Tabinda <sup>4</sup>, Andleeb Mehmood <sup>3</sup>, Jun Li <sup>5</sup>, Gan Zhang <sup>5</sup> and Mudassar Azam <sup>6,\*</sup>

<sup>1</sup>Department of Environmental Sciences, Faculty of Natural Sciences, GC Women University, Sialkot and Pakistan;

<sup>2</sup>Department of Meteorology, COMSATS University, Islamabad Tarlai Kalan, Park Road Islamabad 45550 Pakistan and

<sup>3</sup>State Key Laboratory of Fine Chemicals, Dalian University of Technology, 116024, China;

<sup>4</sup>Sustainable Development Study Centre, Government College University, Lahore, Pakistan;

<sup>5</sup>State Key Laboratory of Organic Geochemistry, Guangzhou Institute of Geochemistry, Chinese Academy of Sciences, Guangzhou 510640 and China;

<sup>6</sup>Institute of Chemical, Environmental and Bio Science Engineering, TU WIEN. Austria

Corresponding Author: mudassar.azam@tuwien.ac.at

**Table 1.** Study area to demonstrate the samples and locations with the reference of map in Figure 1.

|    | Types of samples       | Sampling area                   | Sampling sites                      |
|----|------------------------|---------------------------------|-------------------------------------|
| 1. | Agricultural area soil | KPK                             | S1, S2 and S3                       |
| 2. | Dust                   | Punjab                          | S4, S5, S6, S7, S8, S9, S10 and S11 |
| 3. | Cereal crop (wheat)    | Control sites in Punjab and KPK | C1 (S13) and C2 (S12)               |

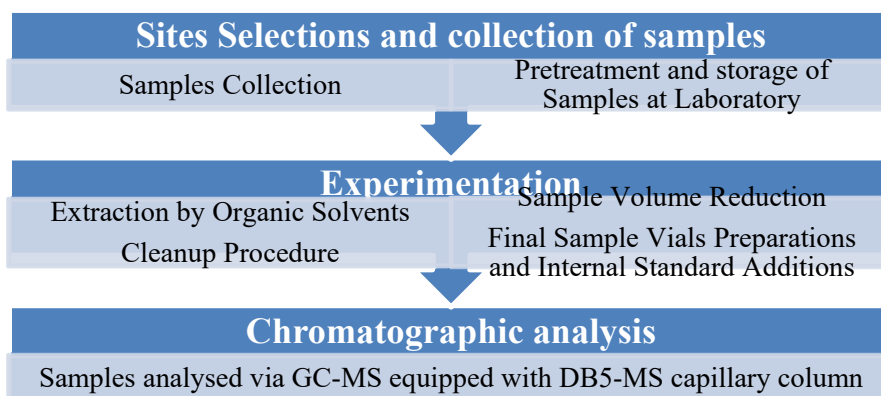

**Figure S1.** Flowchart showing the Sample preparations, cleanup, extraction and analysis procedure

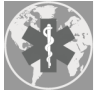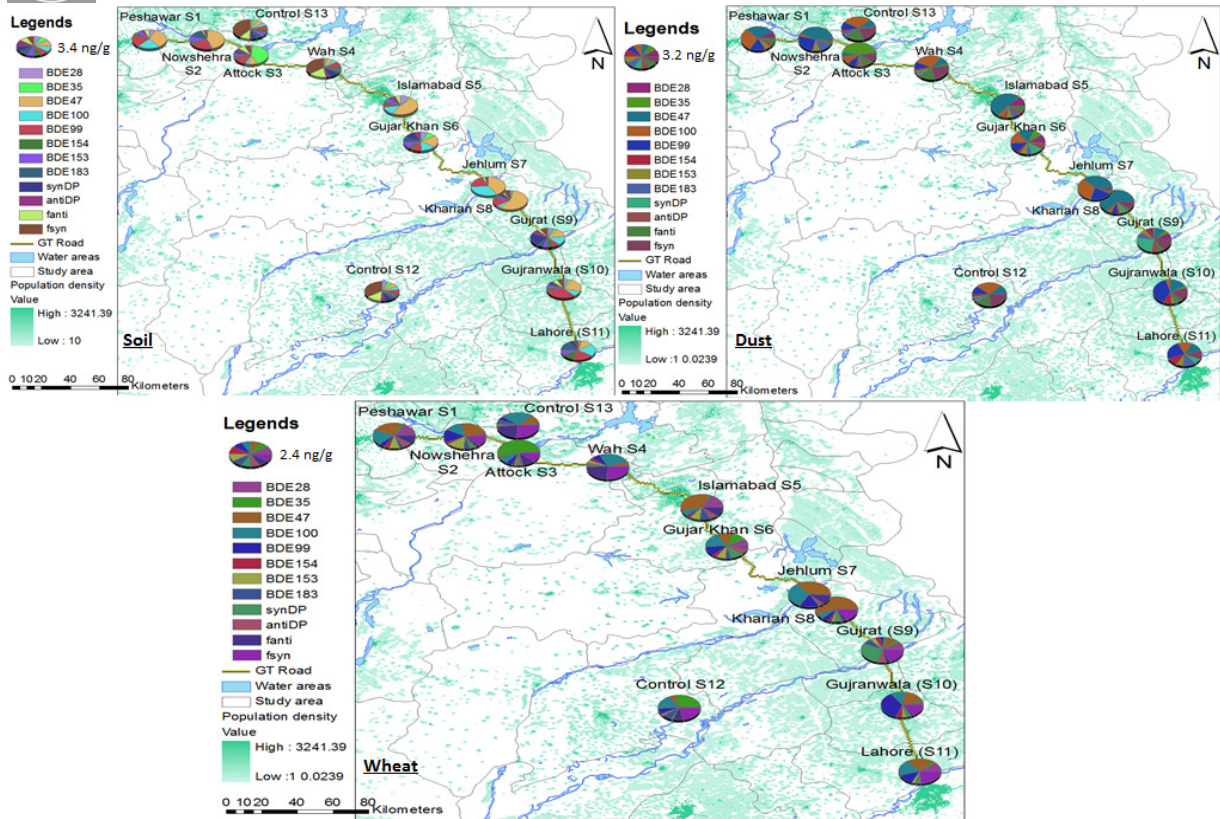

Figure S2. Overall distribution and levels of each detected congener along each site of the study area
